# Supplementary material for: An Overexpression Screen of Toxoplasma gondii Rab-GTPases Reveals Distinct Transport Routes to the Micronemes
Source: PubMed Central journal article supplement (PMC3591302; doi:10.1371/journal.ppat.1003213), 2013-03-07

**Figure S2. Rooted neighbour joining phylograms of 3 major clades (A,B,C) as described in Fig.1**

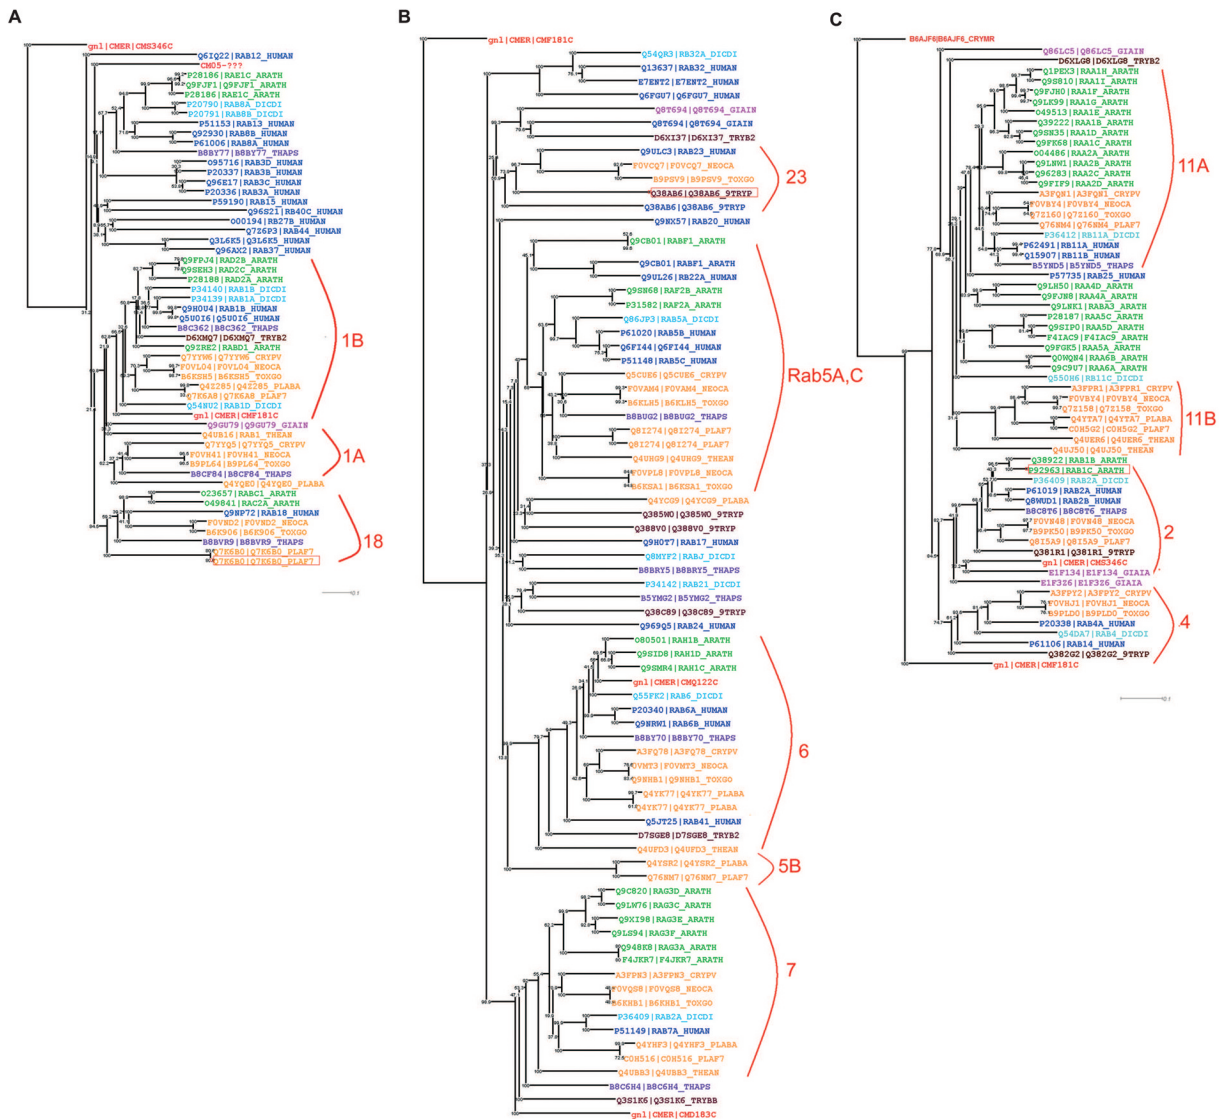

Supplement: ppat.1003213.s002.pdf [file ppat.1003213.s002.pdf]
