# Supplementary material for: An Overexpression Screen of Toxoplasma gondii Rab-GTPases Reveals Distinct Transport Routes to the Micronemes
Source: PubMed Central journal article supplement (PMC3591302; doi:10.1371/journal.ppat.1003213), 2013-03-07

**Figure S4. Localisation of Rab1A, Rab1B, Rab2, Rab4, Rab7 and Rab18**

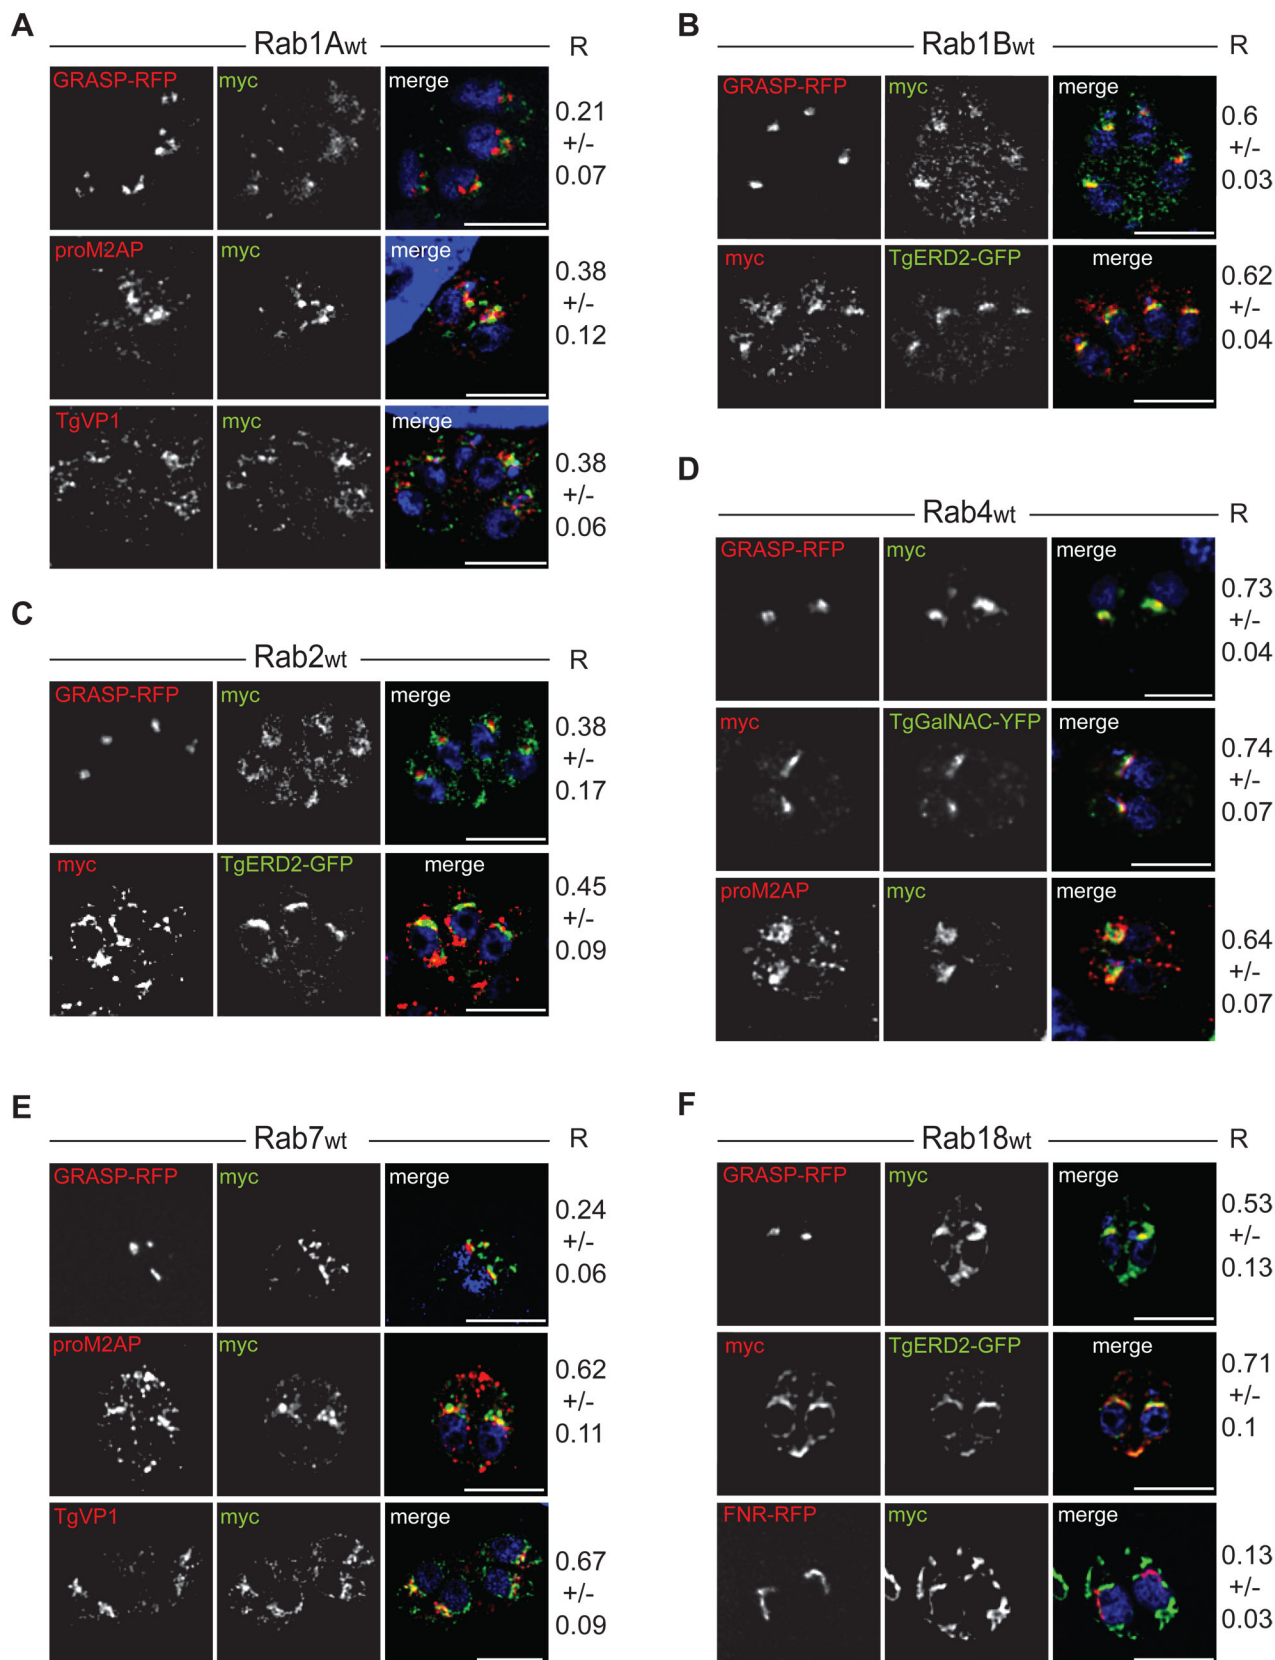

Supplement: ppat.1003213.s004.pdf [file ppat.1003213.s004.pdf]
