# Supplementary material for: An Overexpression Screen of Toxoplasma gondii Rab-GTPases Reveals Distinct Transport Routes to the Micronemes
Source: PubMed Central journal article supplement (PMC3591302; doi:10.1371/journal.ppat.1003213), 2013-03-07

# Figure S5. Localisation of Rab5A, Rab5B and Rab5C

A

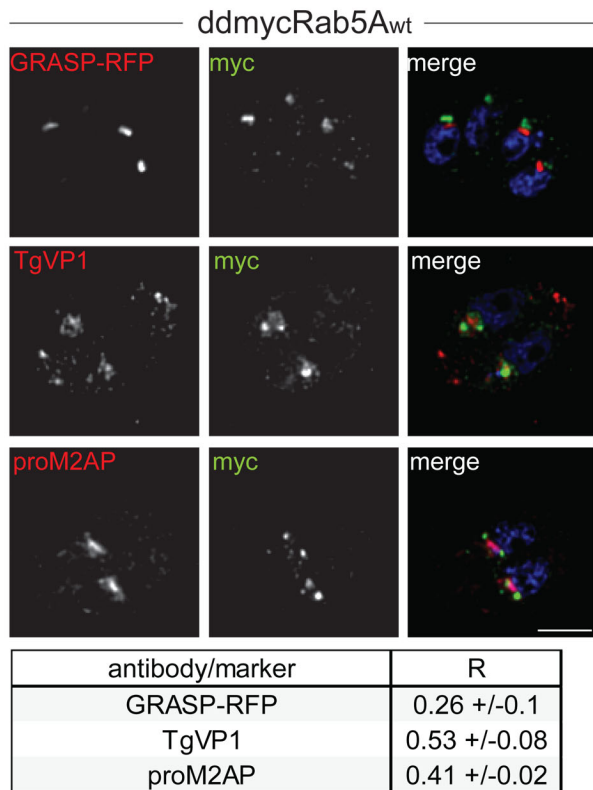

B

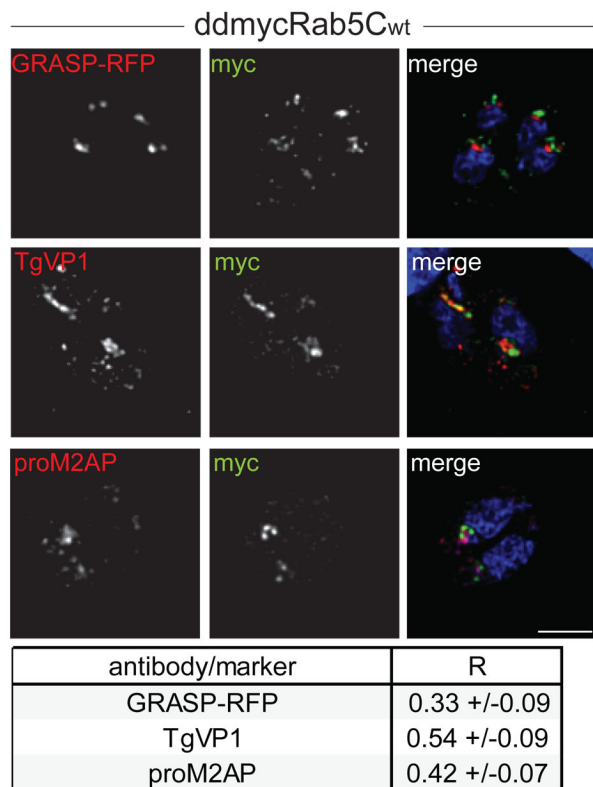

C

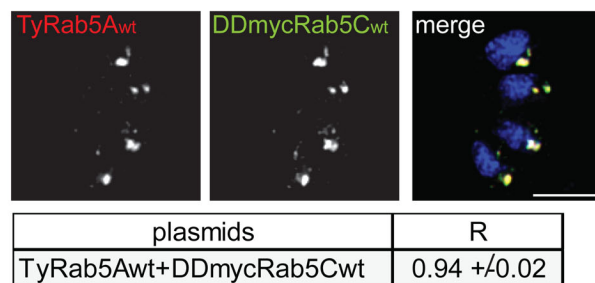

D

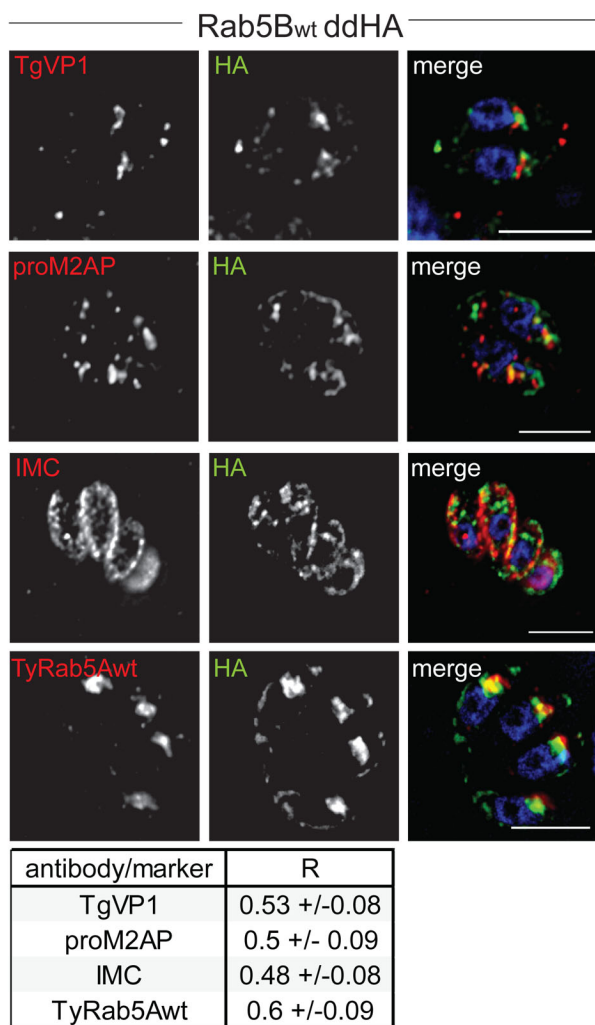

Supplement: ppat.1003213.s005.pdf [file ppat.1003213.s005.pdf]
