# Supplementary material for: An Overexpression Screen of Toxoplasma gondii Rab-GTPases Reveals Distinct Transport Routes to the Micronemes
Source: PubMed Central journal article supplement (PMC3591302; doi:10.1371/journal.ppat.1003213), 2013-03-07

# Figure S7. Characterisation of Rab7

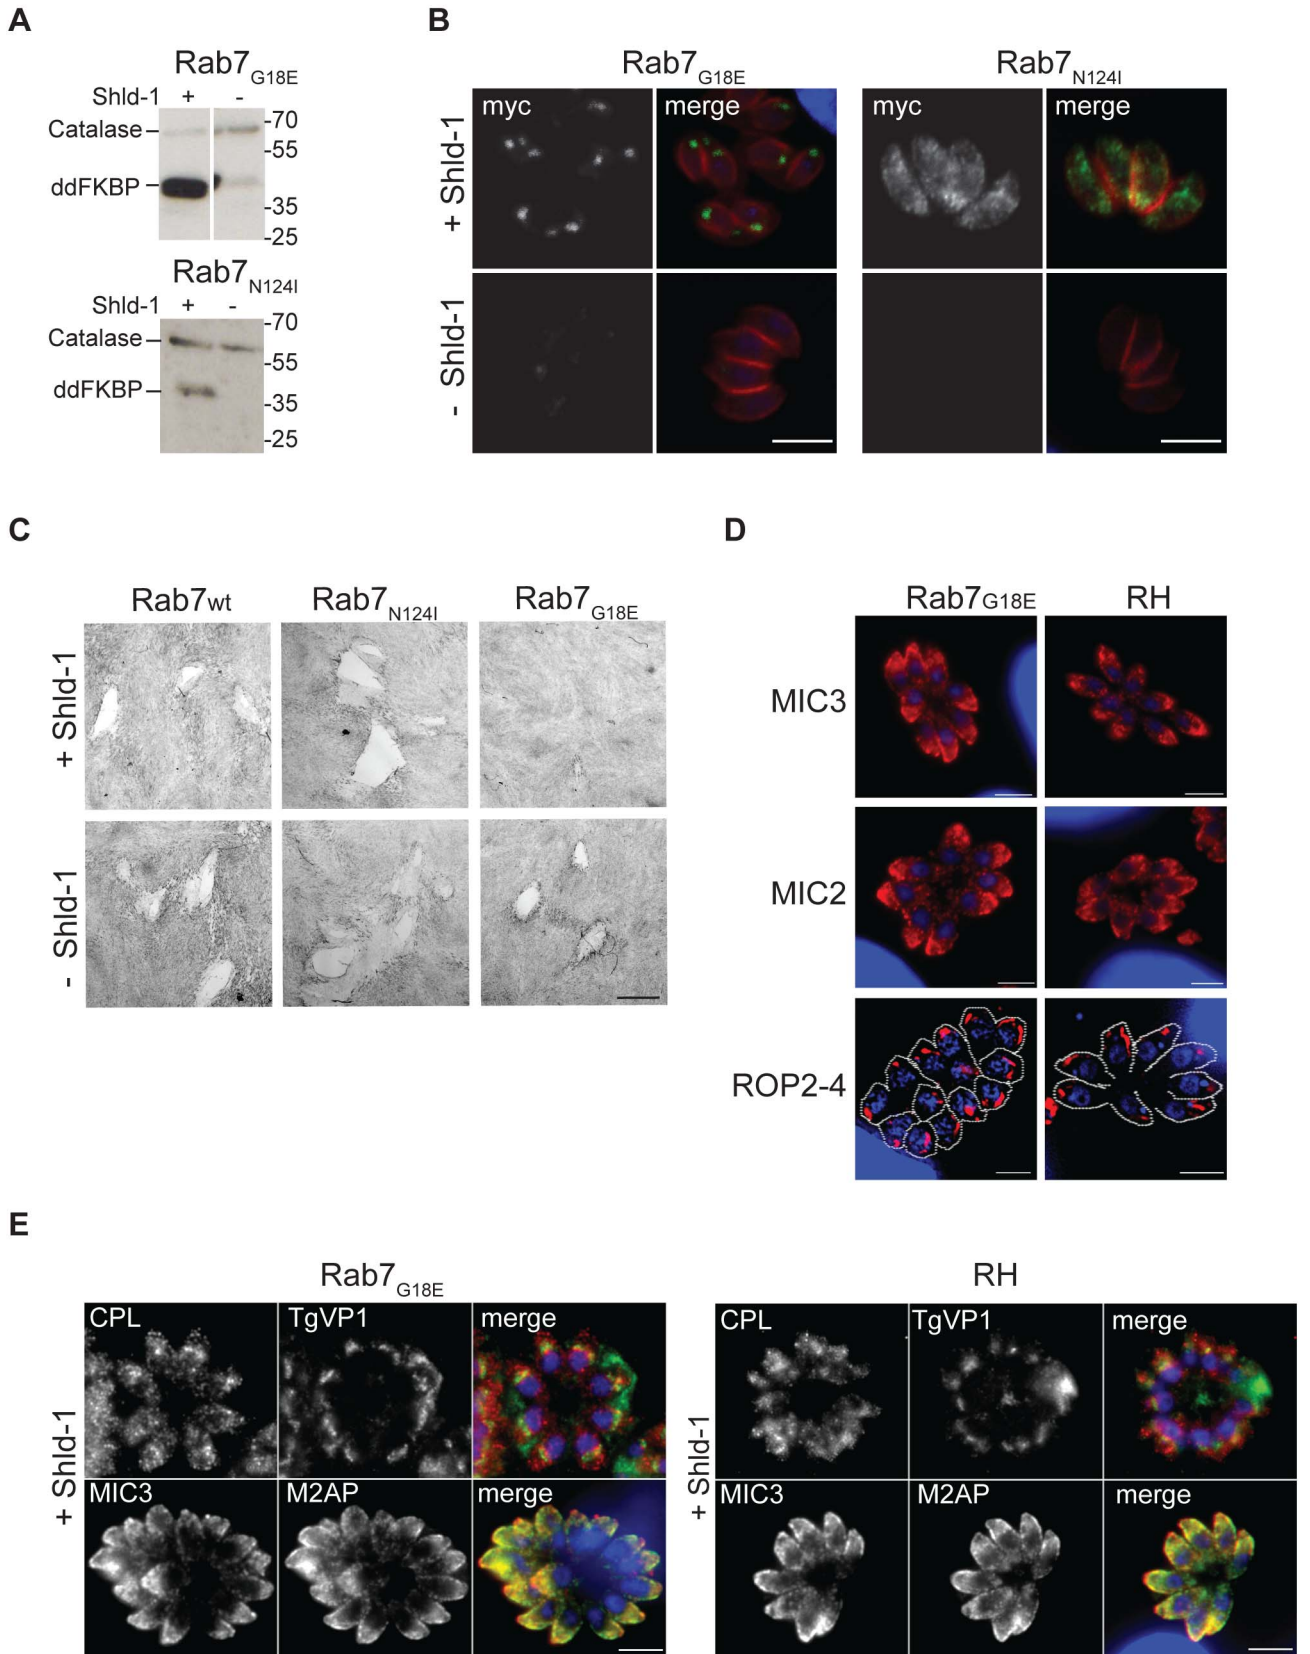

Supplement: ppat.1003213.s007.pdf [file ppat.1003213.s007.pdf]
