# Supplementary material for: An Overexpression Screen of Toxoplasma gondii Rab-GTPases Reveals Distinct Transport Routes to the Micronemes
Source: PubMed Central journal article supplement (PMC3591302; doi:10.1371/journal.ppat.1003213), 2013-03-07

**Figure S9. Analysis of parasites overexpressing ddFKBPRab5A and ddFKBPRab5C**

**A**

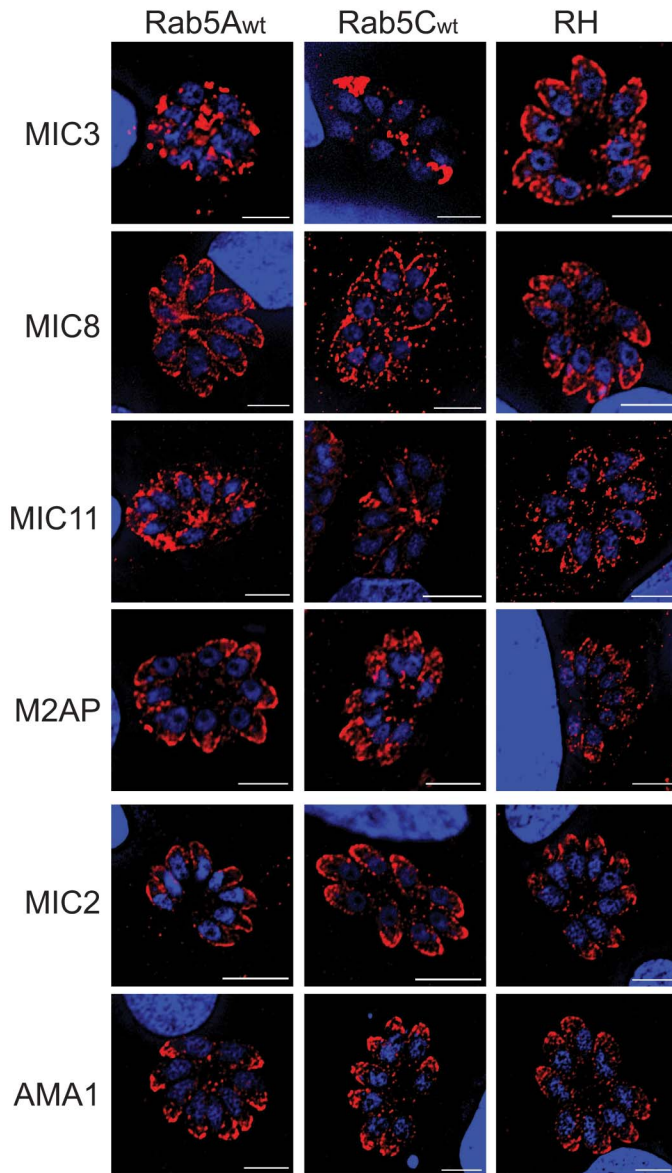

**B**

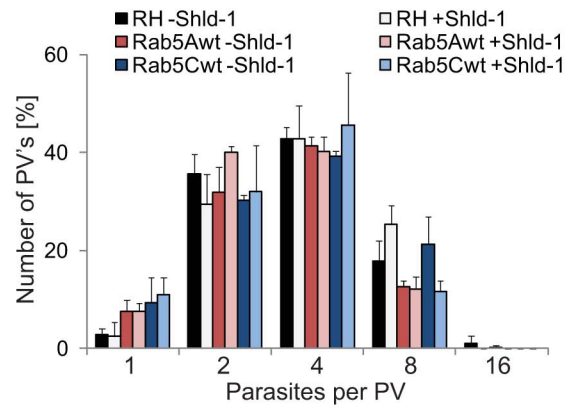

**C**

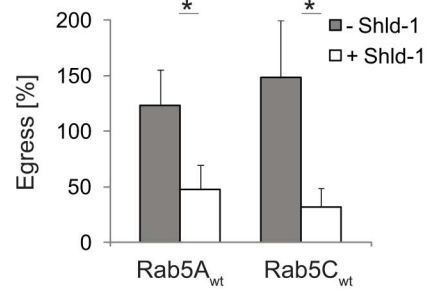

**D**

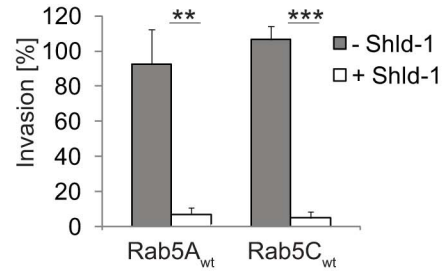

Supplement: ppat.1003213.s009.pdf [file ppat.1003213.s009.pdf]
