# Supplementary material for: An Overexpression Screen of Toxoplasma gondii Rab-GTPases Reveals Distinct Transport Routes to the Micronemes
Source: PubMed Central journal article supplement (PMC3591302; doi:10.1371/journal.ppat.1003213), 2013-03-07
Supplement: ppat.1003213.s013.pdf [file ppat.1003213.s013.pdf]

**Table S1. Overview of Apicomplexan Rabs**

| <b>Rab</b>       | <b>T.gondii</b> | <b>N.caninum</b> | <b>C.parvum</b> | <b>T.parva</b> | <b>B.bovis</b> | <b>P.falciparum</b> |
|------------------|-----------------|------------------|-----------------|----------------|----------------|---------------------|
| <b>1A</b>        | TGME49_258130   | NCLIV_028240     | cgd6_3830       | TP04_0644      | XP_001611865.1 | PFE0690c            |
| <b>1B</b>        | TGME49_214770   | NCLIV_051820     | cgd6_3220       | TP03_0775      | XP_001611213.1 | PFE0625w            |
| <b>2</b>         | TGME49_312050   | NCLIV_055690     | cgd1_2060       | TP01_0877      | XP_001610821.1 | PFL1500w            |
| <b>4</b>         | TGME49_257340   | NCLIV_029730     | cgd8_1040       | no             | no             | no                  |
| <b>5A</b>        | TGME49_267810   | NCLIV_038540     | cgd3_3150       | TP04_0575      | XP_001611807.1 | PFB0500c            |
| <b>5B</b>        | TGME49_207460   | NCLIV_002540     | no              | no             | no             | MAL13P1.51          |
| <b>5C</b>        | TGME49_219720   | NCLIV_060890     | no              | TP01_0639      | XP_001609456.1 | PFA0335w            |
| <b>6</b>         | TGME49_310460   | NCLIV_054540     | cgd2_1940       | TP02_0799      | XP_001611576.1 | PF11_0461           |
| <b>7</b>         | TGME49_248880   | NCLIV_065010     | cgd7_1680       | TP03_0666      | XP_001611307.1 | PFI0155c            |
| <b>11A</b>       | TGME49_289680   | NCLIV_041930     | cgd4_320        | TP01_1204      | XP_001610582.1 | PF13_0119           |
| <b>11B</b>       | TGME49_320480   | NCLIV_009790     | cgd7_4380       | TP02_0559      | XP_001610116.1 | MAL13P1.205         |
| <b>18</b>        | TGME49_313190   | NCLIV_056520     | no              | no             | no             | PF08_0110           |
| <b>23</b>        | TGME49_283530   | NCLIV_015390     | no              | no             | no             | no                  |
| <b>8/10 like</b> | TGME49_243450   | NCLIV_018180     | no              | no             | no             | no                  |
| <b>Rab-like</b>  | TGME49_239855   | no               | no              | no             | no             | no                  |
